# Supplementary material for: Investigation of the active components and mechanisms of Schisandra chinensis in the treatment of asthma based on a network pharmacology approach and experimental validation
Source: Royal Society of Chemistry journal article supplement (doi:10.1039/d0fo00087f), 2020-01-01
Supplement: d0fo00087f2.pdf [file d0fo00087f2.pdf]

**Supplementary Table 1. The relevant targets of asthma**

| Targets                                                                                                                                                                                                                                                                                                                                                                                                                                                                                                                                                                                                                                                                                                                                                                                                                                                                                                                                                                    |
|----------------------------------------------------------------------------------------------------------------------------------------------------------------------------------------------------------------------------------------------------------------------------------------------------------------------------------------------------------------------------------------------------------------------------------------------------------------------------------------------------------------------------------------------------------------------------------------------------------------------------------------------------------------------------------------------------------------------------------------------------------------------------------------------------------------------------------------------------------------------------------------------------------------------------------------------------------------------------|
| Adora2a, Adora2b, Adora1, Alox5, Adecyap1r1, Adrb3, Apoe, Akt1, Adh5, Bdkrb2, Camp, Cysltr1, Cxcr2, Cxcr3, Cxcr4, Csf2, Cacna1c, Cacna1a, Chrm2, Chrm4, Ccr2, Ccr3, Chuk, Calca, Ctsg, Csk, Ctsl, Ctss, Cxcr4, Chrna7, Chrnb2, Ctsb, Cx3cr1, Cfb, Csf2rb2, Crlf2, Cd4, Drd2, Egr1, Elane, Esrra, Erbb2, Fcer1g, Fas, Il1b, Il10, Itgb1, Itga5, Il13, Il13ra1, Il13ra2, Il3ra, Il1r1l, Il4, Il5, Il4ra, Il5ra, Il9, Il9r, Ifng, Itga4, Il17ra, Il23a, Ikbkb, Itgb2, Icam1, Kenma1, Kcnmb1, Kcnq1, Kcne2, Kcne3, Map2k1, Mapk1, Mapk9, Mapk14, Mmp12, Ptgs1, Ptgs2, Ptafr, Pparg, Pecam1, Pla2g4a, Pde6b, Pla2g4a, Pla2g2a, Pde1c, Ptgdr2, Ptger3, Prkaca, Tlr2, Tlr4, Tlr7, Tlr9, Tnf, Tslp, Tacr2, Trp53, Tacr1, Tbx2r, Tnfrsf4, Tnfsf4, Trpv1, Tbxas1, Tnfrsf1a, Scn10a, Sele, SykI, Syt7, Scn5a, Scn9a, Scn8a, Syk, Sell, Ncoa2, Npsr1, Nos2, Ncoa3, Rock1, Rock2, Rosq1, Hrh1, Hspb8, Hrh4, Hrh3, Ltb4r1, Ltb4r2, Lta4h, Nr5a1, Nrros, Romo1, Rela, Uts2r, Vipr2, Oprm1 |
